# Supplementary material
Source: PubMed Central journal article supplement (PMC8049375)
Supplement: jnm247981SupplementaryData.pdf [file jnm247981SupplementaryData.pdf]

# Supplemental Data

**Supplemental Table 1. Patients with histologically proven recurrence of primary tumor at latest response evaluation in active surveillance**

| Patient | CRE | SUL <sub>max, tumor</sub> | SUV <sub>max, tumor</sub> | Weight (kg) | LBM (kg) | Glucose (mmol/L) | Interval (min) | SUL <sub>mean, blood pool</sub> | SUL <sub>mean, liver</sub> | SUL <sub>max, oes</sub> | Lines in graph: — SUL <sub>max, tumor</sub> ; - - SUL <sub>mean, blood pool</sub> ; ..... SUL <sub>max, oes</sub> |
|---------|-----|---------------------------|---------------------------|-------------|----------|------------------|----------------|---------------------------------|----------------------------|-------------------------|-------------------------------------------------------------------------------------------------------------------|
| 1       | 2   | 3.89                      | 4.94                      | 75          | 59       | 5.2              | 63             | 1.25                            | 1.86                       | 1.53                    |                                                                                                                   |
|         | 3   | 4.04                      | 5.19                      | 77          | 60       | missing          | 61             | 1.47                            | 1.93                       | 1.83                    |                                                                                                                   |
| 2       | 2   | 1.94                      | 2.49                      | 81          | 63       | 9.3              | 57             | 1.74                            | 2.13                       | 1.72                    |                                                                                                                   |
|         | 3   | 2.20                      | 2.83                      | 82          | 64       | 9.1              | 64             | 1.59                            | 2.13                       | 1.61                    |                                                                                                                   |
| 3       | 2   | 2.37                      | 2.96                      | 74          | 59       | 8.0              | 59             | 1.81                            | 2.21                       | 2.26                    |                                                                                                                   |
|         | 3   | 3.69                      | 4.52                      | 70          | 57       | 7.1              | 54             | 1.37                            | 1.67                       | 1.57                    |                                                                                                                   |

|   |   |      |      |    |    |     |    |      |      |      |
|---|---|------|------|----|----|-----|----|------|------|------|
| 4 | 2 | 1.82 | 2.75 | 68 | 45 | 6.5 | 67 | 1.3  | 2.04 | 1.35 |
|   | 3 | 5.14 | 7.77 | 68 | 45 | 6.2 | 50 | 1.35 | 1.99 | 1.36 |

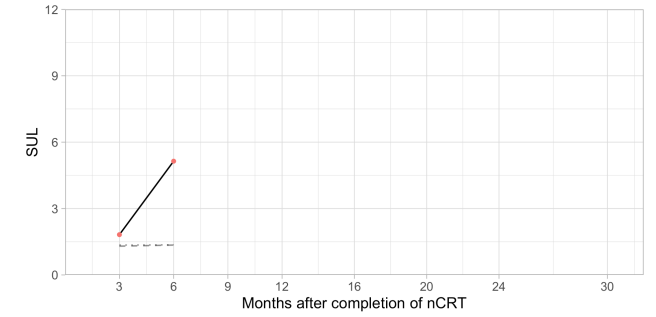

|   |   |      |      |    |    |     |    |      |      |      |
|---|---|------|------|----|----|-----|----|------|------|------|
| 5 | 2 | 2.79 | 3.54 | 70 | 55 | 6.4 | 72 | 1.08 | 1.70 | 1.47 |
|   | 3 | 2.24 | 2.84 | 70 | 55 | 6.1 | 58 | 1.37 | 1.68 | 1.65 |
|   | 4 | 3.18 | 4.07 | 72 | 56 | 5.9 | 61 | 1.30 | 1.78 | 1.78 |

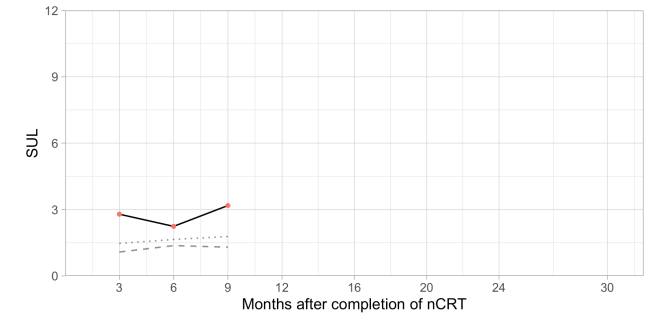

|   |   |      |      |    |    |     |    |      |      |      |
|---|---|------|------|----|----|-----|----|------|------|------|
| 6 | 2 | 4.05 | 5.30 | 85 | 65 | 7.4 | 59 | 1.51 | 1.88 | 1.70 |
|   | 3 | 3.00 | 3.93 | 85 | 65 | 7.2 | 55 | 1.74 | 2.06 | 1.96 |
|   | 4 | 3.09 | 4.04 | 85 | 65 | 6.7 | 55 | 1.68 | 2.18 | 1.89 |
|   | 5 | 4.88 | 6.41 | 86 | 65 | 6.4 | 58 | 1.67 | 2.05 | 2.07 |
|   | 6 | 7.36 | 9.39 | 80 | 63 | 5.2 | 62 | 1.57 | 2.03 | 1.79 |

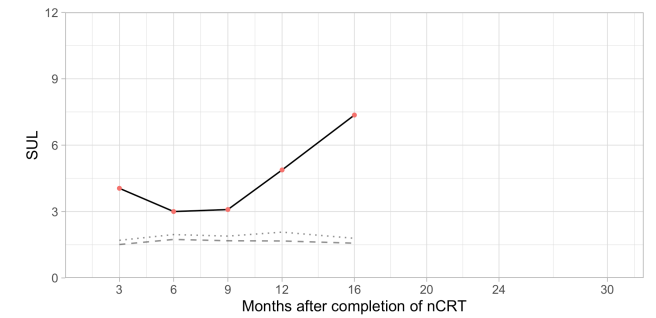

|   |   |      |      |    |    |     |    |      |      |      |
|---|---|------|------|----|----|-----|----|------|------|------|
| 7 | 2 | 1.47 | 1.82 | 80 | 64 | 7.7 | 59 | 1.38 | 1.61 | 1.61 |
|   | 3 | 2.09 | 2.63 | 82 | 65 | 9.7 | 56 | 1.54 | 1.84 | 1.82 |

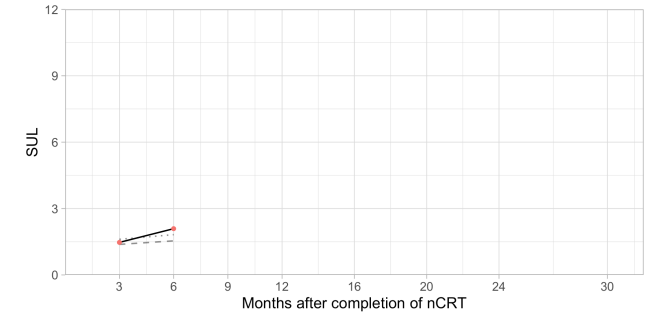

|   |   |      |      |    |    |     |    |      |      |      |
|---|---|------|------|----|----|-----|----|------|------|------|
| 8 | 2 | 2.21 | 3.04 | 93 | 68 | 7.6 | 44 | 1.57 | 2.02 | 2.40 |
|   | 3 | 2.12 | 2.87 | 90 | 67 | 7.2 | 59 | 1.48 | 1.89 | 1.61 |
|   | 4 | 3.69 | 5.10 | 94 | 68 | 8.0 | 51 | 1.56 | 2.10 | 1.41 |

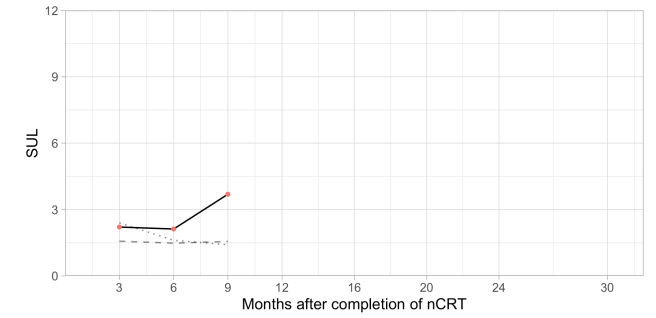

|   |   |       |       |    |    |     |    |      |      |      |
|---|---|-------|-------|----|----|-----|----|------|------|------|
| 9 | 2 | 2.65  | 3.01  | 58 | 51 | 5.9 | 50 | 1.67 | 2.02 | 2.06 |
|   | 3 | 4.55  | 5.27  | 63 | 54 | 5.4 | 50 | 1.63 | 2.14 | 2.08 |
|   | 4 | 11.05 | 12.90 | 65 | 56 | 4.8 | 59 | 1.44 | 1.79 | 2.53 |

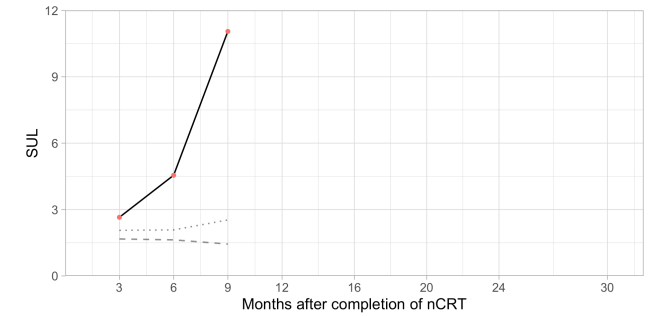

|    |   |      |      |     |    |     |    |      |      |      |
|----|---|------|------|-----|----|-----|----|------|------|------|
| 10 | 2 | 3.65 | 5.28 | 107 | 74 | 5.5 | 60 | 1.50 | 2.46 | 2.18 |
|    | 3 | 4.19 | 6.06 | 107 | 74 | 6.0 | 58 | 1.49 | 2.43 | 1.68 |

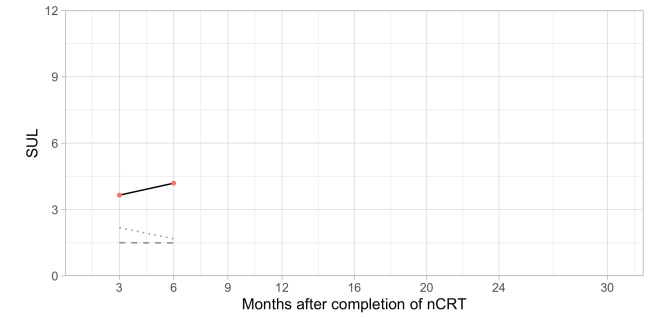

|    |   |      |      |    |    |     |    |      |      |      |
|----|---|------|------|----|----|-----|----|------|------|------|
| 11 | 2 | 2.45 | 3.73 | 76 | 50 | 5.4 | 55 | 1.29 | 1.53 | 1.90 |
|    | 3 | 3.49 | 5.31 | 76 | 50 | 5.7 | 66 | 1.08 | 1.60 | 2.06 |

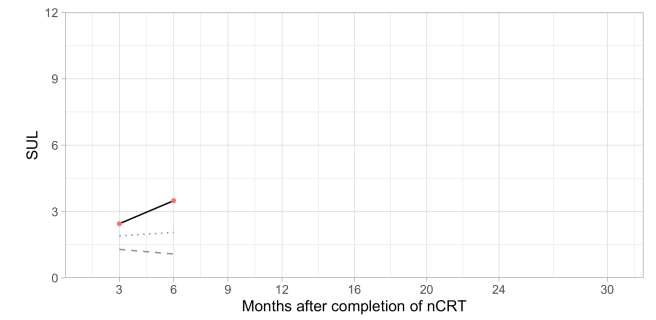

|    |   |      |      |    |    |     |    |      |      |      |
|----|---|------|------|----|----|-----|----|------|------|------|
| 12 | 2 | 2.8  | 3.31 | 56 | 47 | 6.9 | 61 | 1.34 | 1.68 | 1.99 |
|    | 3 | 4.03 | 4.81 | 58 | 49 | 7.7 | 60 | 1.46 | 1.87 | 2.75 |

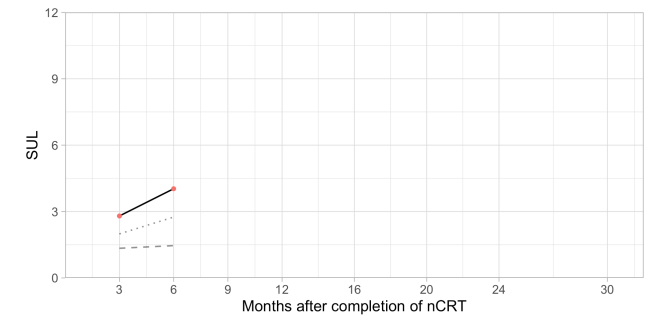

|    |   |      |      |    |    |     |    |      |      |      |
|----|---|------|------|----|----|-----|----|------|------|------|
| 13 | 2 | 3.61 | 4.85 | 88 | 66 | 5.0 | 40 | 1.29 | 1.78 | 2.08 |
|    | 3 | 3.91 | 5.26 | 88 | 66 | 5.2 | 60 | 1.34 | 1.88 | 2.05 |

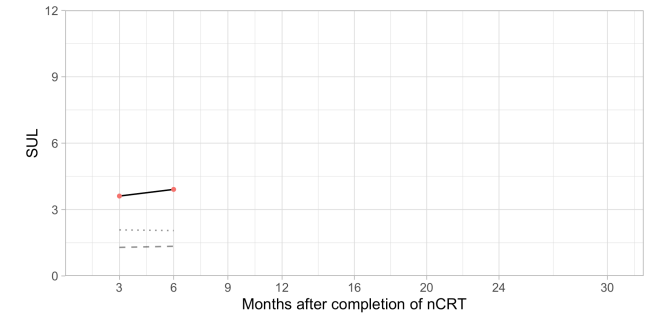

|    |   |       |       |     |    |     |    |      |      |      |
|----|---|-------|-------|-----|----|-----|----|------|------|------|
| 14 | 2 | 2.55  | 3.96  | 108 | 69 | 6.1 | 61 | 1.2  | 1.65 | 1.41 |
|    | 3 | 10.86 | 17.00 | 109 | 70 | 6.0 | 55 | 1.27 | 1.93 | 1.37 |

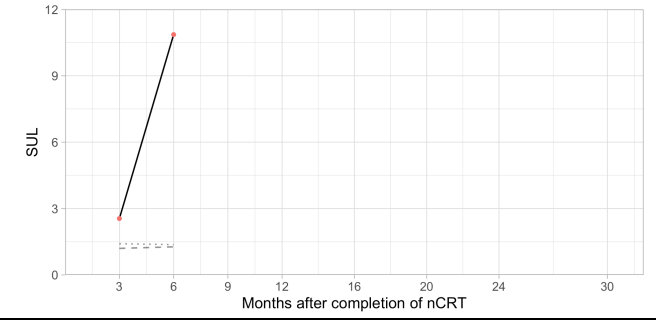

|    |   |      |      |    |    |     |    |      |      |      |
|----|---|------|------|----|----|-----|----|------|------|------|
| 15 | 2 | 2.56 | 3.33 | 81 | 62 | 5.7 | 55 | 1.73 | 2.08 | 2.06 |
|    | 3 | 3.03 | 3.88 | 78 | 61 | 5.1 | 54 | 1.45 | 1.78 | 2.06 |

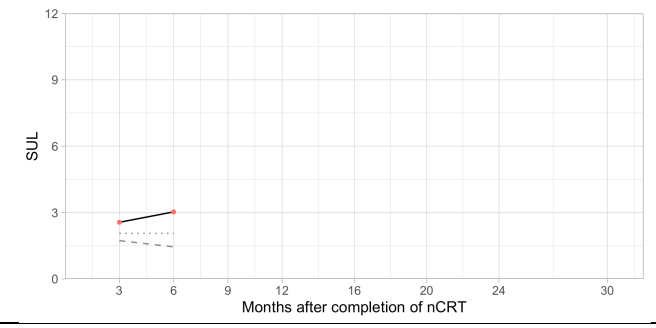

|    |                                      |      |       |    |    |         |    |      |      |      |
|----|--------------------------------------|------|-------|----|----|---------|----|------|------|------|
| 16 | 2                                    | 2.32 | 2.83  | 73 | 60 | 5.8     | 62 | 1.34 | 1.82 | 1.65 |
|    | No scans performed at CRE-3 or CRE-4 |      |       |    |    |         |    |      |      |      |
|    | 5                                    | 6.63 | 8.46  | 75 | 59 | missing | 50 | 1.36 | 1.92 | 2.58 |
|    | 6                                    | 8.41 | 10.69 | 74 | 58 | 5.8     | 54 | 1.27 | 1.87 | 2.28 |

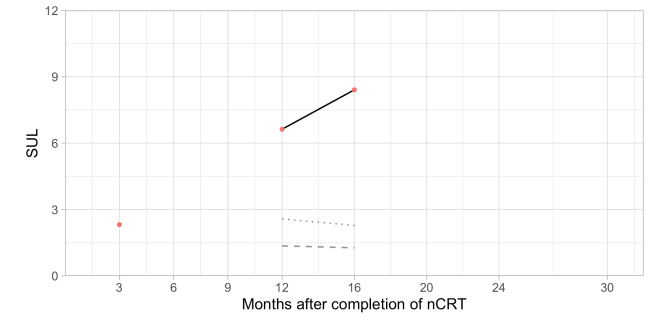

|    |   |      |      |     |    |     |    |      |      |      |
|----|---|------|------|-----|----|-----|----|------|------|------|
| 17 | 2 | 4.84 | 6.88 | 112 | 79 | 8.4 | 53 | 1.44 | 2.13 | 2.81 |
|    | 3 | 5.64 | 8.33 | 112 | 76 | 8.0 | 52 | 1.37 | 2.00 | 1.87 |

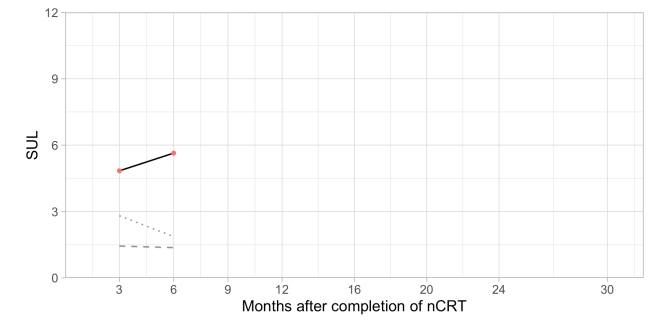

|    |   |      |      |    |    |         |    |      |      |      |
|----|---|------|------|----|----|---------|----|------|------|------|
| 18 | 2 | 1.98 | 2.48 | 76 | 61 | 4.3     | 69 | 1.05 | 1.34 | 1.74 |
|    | 3 | 4.87 | 6.09 | 76 | 61 | 5.7     | 67 | 1.19 | 1.74 | 3.16 |
|    | 4 | 4.55 | 5.80 | 80 | 63 | 5.1     | 51 | 1.71 | 1.96 | 2.88 |
|    | 5 | 4.45 | 5.57 | 76 | 61 | 5.3     | 51 | 1.73 | 2.04 | 2.61 |
|    | 6 | 4.32 | 5.40 | 76 | 61 | 5.0     | 53 | 1.53 | 1.85 | 2.58 |
|    | 7 | 4.22 | 5.33 | 78 | 62 | 6.2     | 55 | 1.47 | 1.86 | 3.18 |
|    | 8 | 5.04 | 6.37 | 78 | 62 | 5.3     | 59 | 1.39 | 1.85 | 3.14 |
|    | 9 | 7.59 | 9.49 | 76 | 61 | missing | 57 | 1.29 | 1.71 | 2.84 |

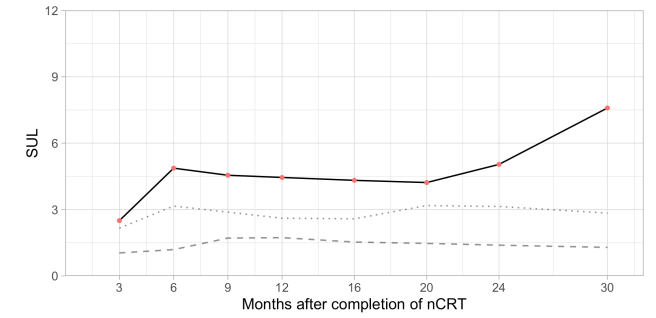

|    |   |      |      |    |    |     |    |      |      |      |
|----|---|------|------|----|----|-----|----|------|------|------|
| 19 | 2 | 3.68 | 5.52 | 67 | 45 | 5.6 | 50 | 1.42 | 1.90 | 2.48 |
|    | 3 | 2.85 | 4.23 | 66 | 44 | 6.3 | 59 | 1.25 | 1.82 | 2.45 |
|    | 4 | 3.50 | 5.11 | 65 | 45 | 4.9 | 60 | 1.58 | 1.98 | 1.67 |

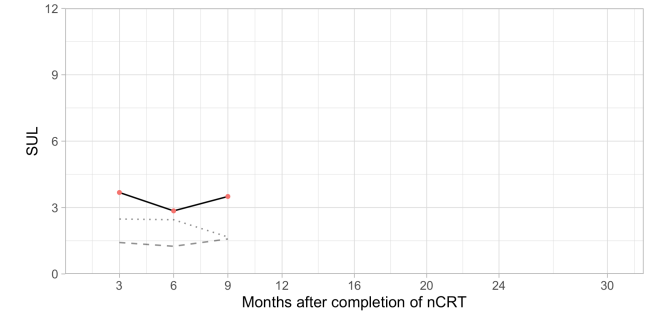

|    |   |      |      |    |    |     |    |      |      |      |
|----|---|------|------|----|----|-----|----|------|------|------|
| 20 | 2 | 2.93 | 3.66 | 79 | 63 | 4.9 | 65 | 1.15 | 1.53 | 1.56 |
|    | 3 | 3.62 | 4.60 | 83 | 65 | 5.1 | 65 | 1.21 | 1.57 | 1.71 |

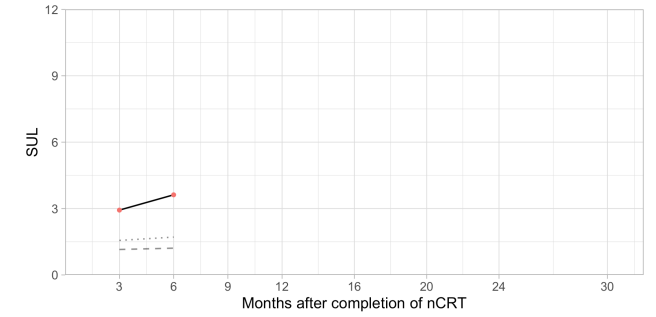

|    |   |      |      |    |    |     |    |      |      |      |
|----|---|------|------|----|----|-----|----|------|------|------|
| 21 | 2 | 3.20 | 3.98 | 62 | 50 | 5.4 | 52 | 1.78 | 2.11 | 2.87 |
|    | 3 | 2.92 | 3.73 | 65 | 51 | 5.2 | 63 | 1.22 | 1.56 | 1.71 |
|    | 4 | 2.92 | 3.62 | 62 | 50 | 4.7 | 55 | 1.45 | 2.85 | 2.06 |
|    | 5 | 4.23 | 5.39 | 63 | 49 | 5.2 | 56 | 1.36 | 1.68 | 1.84 |

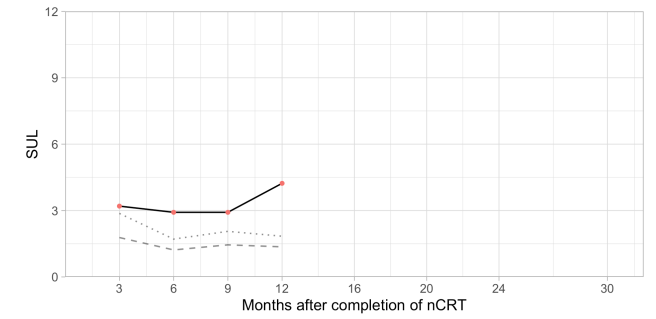

|    |   |      |      |    |    |     |    |      |      |      |
|----|---|------|------|----|----|-----|----|------|------|------|
| 22 | 2 | 2.85 | 3.62 | 67 | 53 | 5.1 | 60 | 1.30 | 1.78 | 2.19 |
|    | 3 | 3.86 | 4.86 | 67 | 53 | 4.9 | 56 | 1.45 | 1.90 | 2.26 |

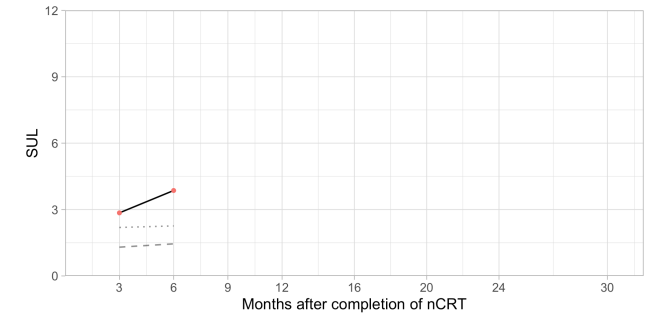



|    |   |      |      |     |    |     |    |      |      |      |
|----|---|------|------|-----|----|-----|----|------|------|------|
| 23 | 2 | 5.00 | 7.44 | 122 | 82 | 6.7 | 50 | 1.49 | 2.01 | 3.02 |
|    | 3 | 5.37 | 7.98 | 122 | 82 | 7.0 | 50 | 1.42 | 2.17 | 2.97 |
|    | 4 | 4.54 | 7.32 | 128 | 80 | 8.0 | 58 | 1.44 | 2.00 | 2.40 |
|    | 5 | 5.86 | 9.55 | 130 | 80 | 8.8 | 63 | 1.49 | 2.00 | 1.68 |

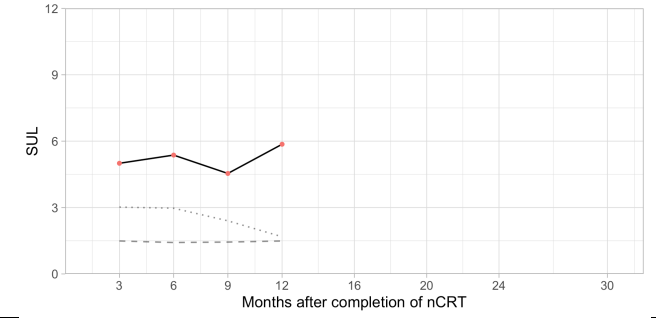

|    |   |      |      |    |    |     |    |      |      |      |
|----|---|------|------|----|----|-----|----|------|------|------|
| 24 | 2 | 3.92 | 4.60 | 64 | 55 | 5.3 | 50 | 1.60 | 1.83 | 2.23 |
|    | 3 | 3.67 | 4.39 | 64 | 53 | 4.9 | 50 | 1.34 | 1.78 | 2.19 |

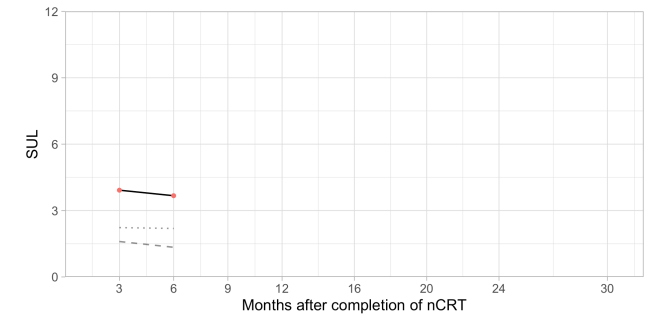

LBM = lean body mass;  $SUL_{max}$  = maximum standardized uptake value corrected for lean body mass;  $SUL_{max, oes}$  =  $SUL_{max}$  in the physiological esophagus; nCRT = neoadjuvant chemoradiotherapy.

**Supplemental Table 2. Patients with ongoing clinically complete response of primary tumor during active surveillance**

| Patient | CRE | SUL <sub>max, tumor</sub> | SUV <sub>max, tumor</sub> | Weight (kg) | LBM (kg) | Glucose (mmol/L) | Interval (min) | SUL <sub>mean, blood pool</sub> | SUL <sub>mean, liver</sub> | SUL <sub>max, oes</sub> | Lines in graph: — SUL <sub>max, tumor</sub> ; - - SUL <sub>mean, blood pool</sub> ; ····· SUL <sub>max, oes</sub> |
|---------|-----|---------------------------|---------------------------|-------------|----------|------------------|----------------|---------------------------------|----------------------------|-------------------------|-------------------------------------------------------------------------------------------------------------------|
| 25      | 2   | 3.69                      | 5.45                      | 90          | 61       | 6.4              | 51             | 1.15                            | 1.53                       | 1.89                    |                                                                                                                   |
|         | 3   | 3.07                      | 4.60                      | 92          | 61       | 6.0              | 67             | missing                         | missing                    | missing                 |                                                                                                                   |
|         | 4   | 2.85                      | 4.11                      | 97          | 67       | 5.8              | 62             | 1.39                            | 1.62                       | 1.85                    |                                                                                                                   |
|         | 5   | 2.79                      | 4.46                      | 101         | 63       | 6.6              | 59             | 1.16                            | 1.59                       | 1.92                    |                                                                                                                   |
|         | 6   | 2.13                      | 3.40                      | 101         | 63       | 5.8              | 62             | 1.16                            | 1.60                       | 1.38                    |                                                                                                                   |
|         | 7   | 2.33                      | 3.84                      | 105         | 64       | 5.7              | 63             | 1.11                            | 1.43                       | 1.53                    |                                                                                                                   |
|         | 8   | 2.25                      | 3.71                      | 105         | 64       | 6.4              | 68             | 1.29                            | 1.41                       | 1.77                    |                                                                                                                   |
|         | 26  | 2                         | 2.09                      | 3.05        | 98       | 67               | 4.9            | 59                              | 1.31                       | 1.80                    |                                                                                                                   |
| 3       |     | 1.8                       | 2.61                      | 97          | 67       | 5.1              | 59             | 1.5                             | 1.77                       | 1.55                    |                                                                                                                   |
| 4       |     | 2.29                      | 3.32                      | 97          | 67       | 5.1              | 56             | 1.42                            | 1.95                       | 1.67                    |                                                                                                                   |
| 5       |     | 2.53                      | 3.67                      | 97          | 67       | 5.1              | 61             | 1.46                            | 1.74                       | 1.72                    |                                                                                                                   |
| 6       |     | 2.09                      | 3.03                      | 97          | 67       | 4.6              | 59             | 1.29                            | 1.72                       | 1.89                    |                                                                                                                   |
| 7       |     | 2.41                      | 3.44                      | 95          | 66       | 5.2              | 58             | 1.69                            | 1.97                       | 2.06                    |                                                                                                                   |

|    |   |      |      |    |    |     |    |      |      |      |
|----|---|------|------|----|----|-----|----|------|------|------|
| 27 | 2 | 3.17 | 4.07 | 77 | 60 | 5.2 | 57 | 1.32 | 1.68 | 1.75 |
|    | 3 | 2.89 | 3.71 | 77 | 60 | 5.9 | 64 | 1.45 | 1.75 | 1.79 |
|    | 4 | 3.67 | 4.71 | 77 | 60 | 4.7 | 56 | 1.64 | 1.96 | 2.81 |
|    | 5 | 2.37 | 3.13 | 82 | 62 | 6.1 | 61 | 1.44 | 1.71 | 1.48 |
|    | 6 | 2.93 | 3.73 | 75 | 59 | 5.8 | 68 | 1.27 | 1.60 | 1.76 |
|    | 7 | 2.11 | 2.69 | 75 | 59 | 5.3 | 59 | 1.43 | 1.74 | 2.09 |

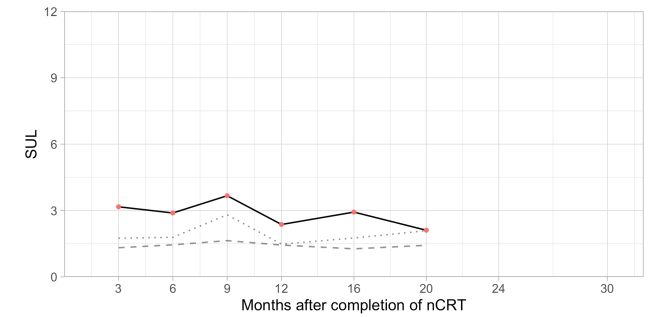

|    |   |      |      |    |    |     |    |      |      |      |
|----|---|------|------|----|----|-----|----|------|------|------|
| 28 | 2 | 3.75 | 4.65 | 73 | 59 | 7.0 | 66 | 1.42 | 1.95 | 1.21 |
|    | 3 | 1.80 | 2.26 | 76 | 61 | 4.3 | 73 | 1.41 | 2.08 | 2.34 |
|    | 4 | 2.27 | 2.90 | 79 | 62 | 5.0 | 59 | 1.66 | 2.37 | 2.44 |
|    | 5 | 1.30 | 1.65 | 78 | 62 | 5.5 | 63 | 0.94 | 1.51 | 1.46 |
|    | 6 | 1.84 | 2.34 | 78 | 62 | 4.7 | 64 | 1.36 | 1.79 | 1.66 |
|    | 7 | 1.82 | 2.72 | 98 | 66 | 6.6 | 63 | 1.32 | 1.51 | 1.33 |

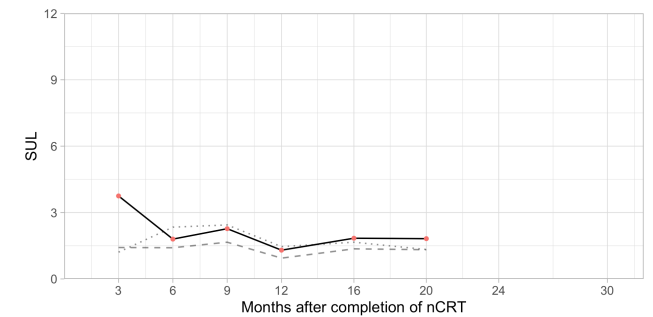

|    |                                             |      |      |    |     |     |      |      |      |      |
|----|---------------------------------------------|------|------|----|-----|-----|------|------|------|------|
| 29 | 2                                           | 1.30 | 1.63 | 47 | 38  | 5.8 | 63   | 0.94 | 1.38 | 1.64 |
|    | 3                                           | 1.53 | 1.91 | 47 | 38  | 5.6 | 56   | 1.03 | 1.42 | 1.62 |
|    | 4                                           | 1.57 | 1.93 | 45 | 37  | 5.4 | 66   | 1.17 | 1.39 | 1.80 |
|    | 5                                           | 1.84 | 2.27 | 45 | 37  | 5.4 | 65   | 1.12 | 1.47 | 2.03 |
|    | 6                                           | 1.64 | 2.01 | 45 | 37  | 4.8 | 61   | 1.18 | 1.47 | 1.90 |
|    | no scans performed between CRE-6 and CRE-13 |      |      |    |     |     |      |      |      |      |
| 13 | 2.03                                        | 2.46 | 42   | 35 | 5.7 | 65  | 1.11 | 1.44 | 2.31 |      |

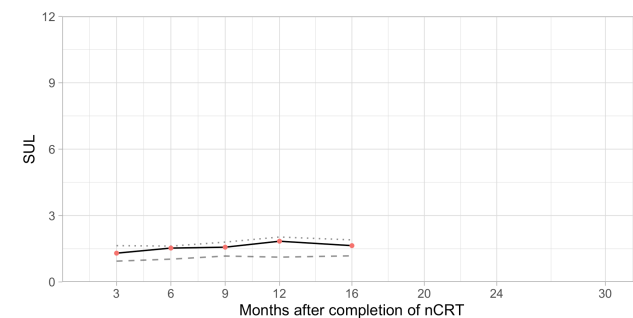

|    |   |      |      |    |    |     |    |      |      |      |
|----|---|------|------|----|----|-----|----|------|------|------|
| 30 | 2 | 1.82 | 2.80 | 78 | 51 | 7.9 | 60 | 1.46 | 1.95 | 1.28 |
|    | 3 | 1.75 | 2.70 | 78 | 51 | 7.7 | 58 | 1.40 | 2.47 | 1.29 |
|    | 4 | 1.60 | 2.46 | 78 | 51 | 8.9 | 58 | 1.46 | 1.93 | 1.53 |
|    | 5 | 1.61 | 2.45 | 77 | 51 | 8.3 | 58 | 1.38 | 1.90 | 1.39 |
|    | 6 | 1.86 | 2.74 | 73 | 49 | 7.8 | 61 | 1.45 | 2.07 | 1.48 |
|    | 7 | 1.85 | 2.66 | 70 | 49 | 8.7 | 56 | 1.48 | 2.05 | 1.29 |

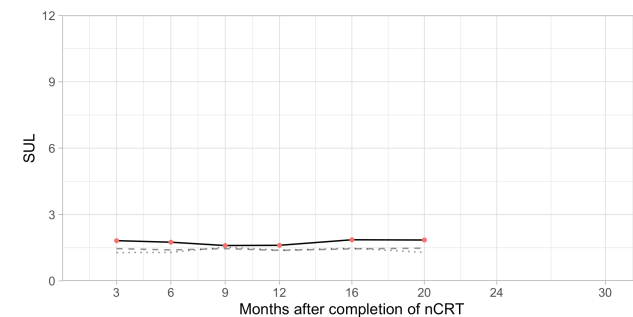

|    |   |      |      |    |    |     |    |      |      |      |
|----|---|------|------|----|----|-----|----|------|------|------|
| 31 | 2 | 3.35 | 4.17 | 42 | 34 | 4.5 | 62 | 1.29 | 1.58 | 1.21 |
|    | 3 | 2.18 | 2.71 | 42 | 34 | 5.1 | 59 | 1.28 | 1.65 | 1.45 |
|    | 4 | 2.44 | 2.96 | 39 | 32 | 4.7 | 58 | 1.25 | 1.60 | 1.25 |
|    | 5 | 2.08 | 2.48 | 37 | 31 | 5.2 | 60 | 1.23 | 1.61 | 1.03 |
|    | 6 | 2.33 | 2.79 | 37 | 31 | 4.9 | 59 | 1.28 | 1.60 | 1.15 |
|    | 7 | 1.70 | 2.02 | 37 | 31 | 5.7 | 63 | 1.16 | 1.55 | 1.37 |
|    | 8 | 1.76 | 2.11 | 38 | 32 | 4.8 | 63 | 1.2  | 1.71 | 1.25 |

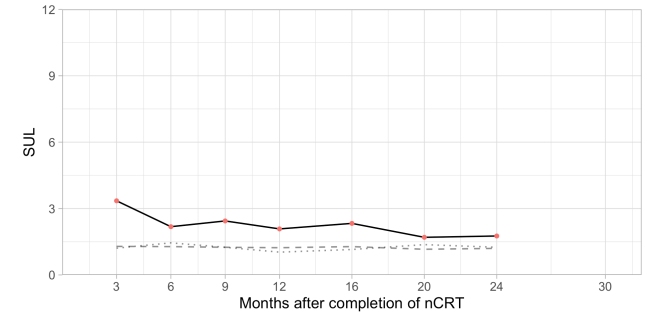

|    |   |      |      |    |    |     |    |      |      |      |
|----|---|------|------|----|----|-----|----|------|------|------|
| 32 | 2 | 3.22 | 4.92 | 83 | 54 | 5.6 | 60 | 1.21 | 1.92 | 1.32 |
|    | 3 | 2.12 | 3.29 | 85 | 55 | 5.6 | 56 | 1.04 | 1.85 | 1.56 |
|    | 4 | 1.85 | 2.87 | 85 | 55 | 5.4 | 58 | 1.3  | 1.61 | 1.74 |

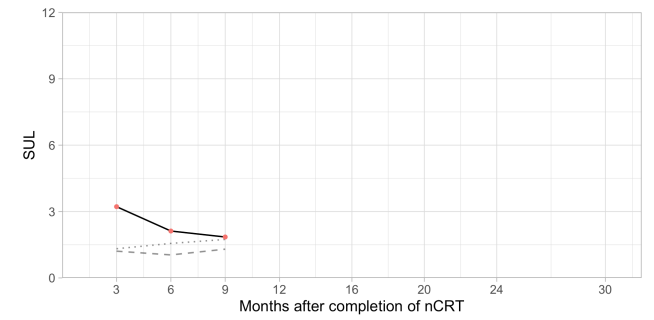

|    |   |      |      |    |    |     |    |      |      |      |
|----|---|------|------|----|----|-----|----|------|------|------|
| 33 | 2 | 2.01 | 2.50 | 55 | 44 | 5.9 | 60 | 1.00 | 1.20 | 1.30 |
|    | 3 | 2.41 | 3.01 | 56 | 45 | 6.1 | 62 | 1.26 | 1.47 | 1.77 |
|    | 4 | 1.73 | 2.19 | 58 | 46 | 5.1 | 55 | 1.31 | 1.61 | 1.87 |
|    | 5 | 2.51 | 3.18 | 58 | 46 | 5.5 | 60 | 1.19 | 1.44 | 1.94 |
|    | 6 | 2.02 | 2.56 | 58 | 46 | 5.2 | 58 | 1.30 | 1.51 | 1.89 |
|    | 7 | 1.61 | 1.99 | 54 | 44 | 4.8 | 58 | 1.10 | 1.31 | 1.11 |

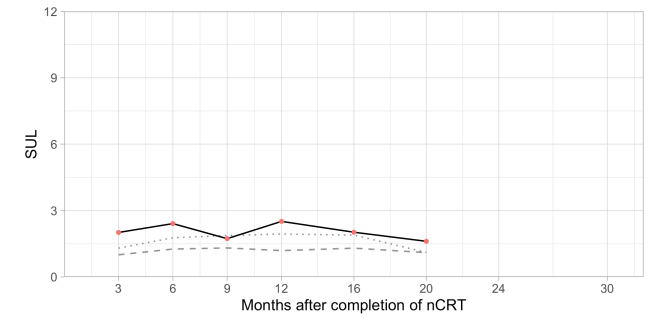

|    |   |      |      |    |    |     |    |      |      |      |
|----|---|------|------|----|----|-----|----|------|------|------|
| 34 | 2 | 2.55 | 3.27 | 72 | 56 | 4.8 | 55 | 1.20 | 1.47 | 1.72 |
|    | 3 | 2.29 | 2.97 | 74 | 57 | 5.5 | 64 | 1.04 | 1.41 | 1.63 |

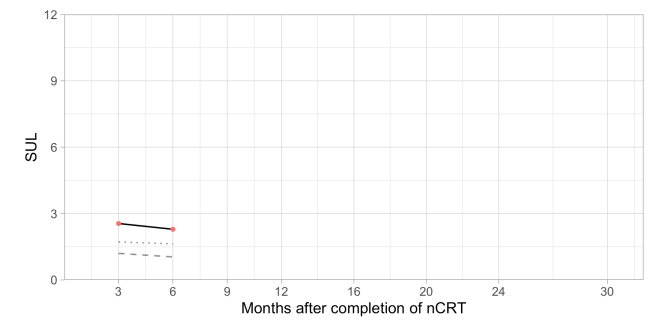

|    |   |      |      |    |    |     |    |      |      |      |
|----|---|------|------|----|----|-----|----|------|------|------|
| 35 | 2 | 1.79 | 2.25 | 73 | 58 | 5.5 | 60 | 1.30 | 1.6  | 1.84 |
|    | 3 | 1.85 | 2.33 | 73 | 58 | 6.7 | 56 | 1.47 | 1.72 | 1.76 |
|    | 4 | 1.13 | 1.42 | 73 | 58 | 7.3 | 68 | 0.92 | 1.23 | 1.67 |
|    | 5 | 2.22 | 2.81 | 74 | 59 | 7.3 | 65 | 1.22 | 1.51 | 1.55 |

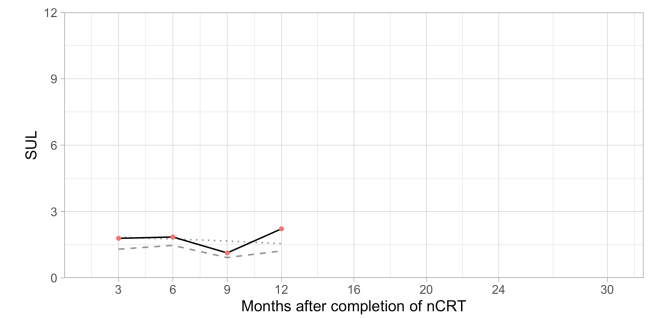

|    |   |      |      |    |    |     |    |      |      |      |
|----|---|------|------|----|----|-----|----|------|------|------|
| 36 | 2 | 2.70 | 4.28 | 85 | 54 | 6.3 | 60 | 1.02 | 1.50 | 1.47 |
|    | 3 | 2.09 | 3.41 | 88 | 54 | 5.9 | 60 | 1.01 | 1.53 | 1.07 |

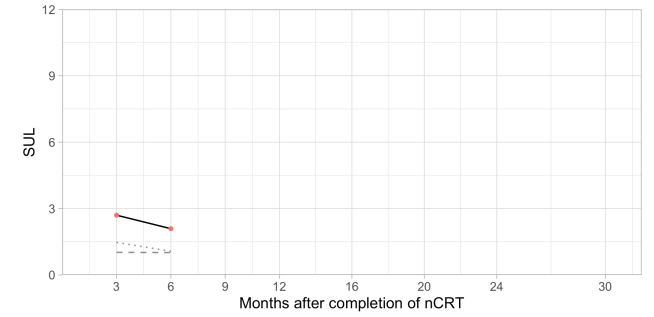

|    |   |      |      |    |    |     |    |      |      |      |
|----|---|------|------|----|----|-----|----|------|------|------|
| 37 | 2 | 2.59 | 3.33 | 77 | 60 | 8.0 | 61 | 1.49 | 1.71 | 1.78 |
|    | 3 | 2.42 | 3.06 | 77 | 61 | 8.5 | 65 | 1.33 | 1.61 | 1.63 |

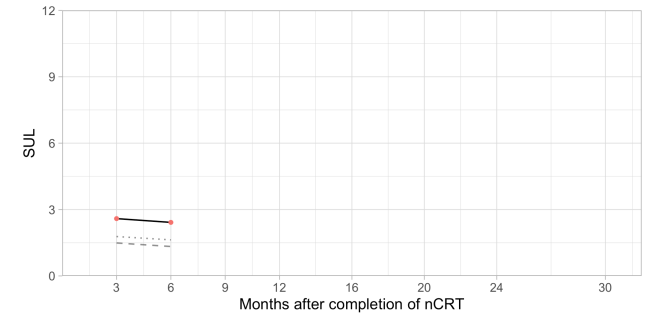

|    |   |      |      |    |    |     |    |      |      |      |
|----|---|------|------|----|----|-----|----|------|------|------|
| 38 | 2 | 3.10 | 5.06 | 82 | 50 | 5.6 | 64 | 1.19 | 1.46 | 2.66 |
|    | 3 | 3.75 | 5.84 | 76 | 49 | 5.2 | 76 | 1.25 | 1.53 | 2.78 |

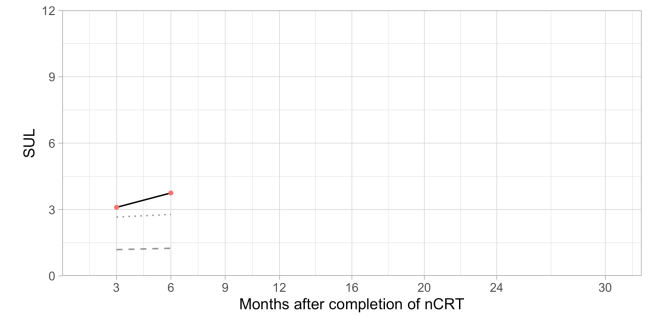

|    |   |      |      |    |    |     |    |      |      |      |
|----|---|------|------|----|----|-----|----|------|------|------|
| 39 | 2 | 3.53 | 4.37 | 73 | 59 | 5.3 | 55 | 1.44 | 2.60 | 1.64 |
|    | 3 | 3.20 | 4.00 | 75 | 60 | 5.2 | 58 | 1.34 | 1.76 | 1.84 |
|    | 4 | 3.04 | 3.86 | 74 | 58 | 5.5 | 64 | 1.27 | 1.80 | 1.76 |
|    | 5 | 2.77 | 3.54 | 75 | 59 | 5.3 | 58 | 1.40 | 1.88 | 1.79 |
|    | 6 | 2.88 | 3.70 | 75 | 58 | 5.9 | 56 | 1.29 | 1.68 | 1.66 |
|    | 7 | 3.32 | 4.31 | 77 | 59 | 5.6 | 59 | 1.33 | 1.78 | 1.45 |

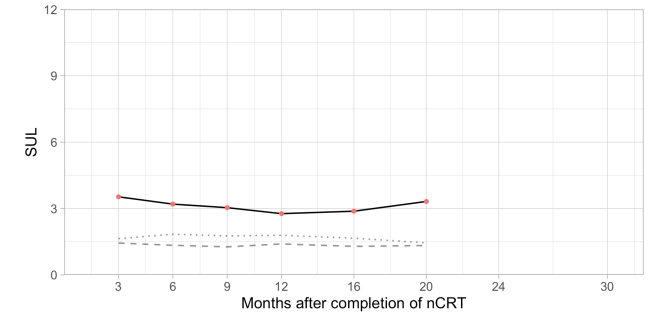

|    |   |      |      |     |    |     |    |      |      |      |
|----|---|------|------|-----|----|-----|----|------|------|------|
| 40 | 2 | 2.39 | 3.43 | 102 | 71 | 6.2 | 59 | 1.44 | 2.31 | 1.89 |
|    | 3 | 1.34 | 1.87 | 98  | 70 | 6.3 | 64 | 1.62 | 2.15 | 1.98 |
|    | 4 | 2.20 | 3.11 | 100 | 71 | 5.5 | 60 | 1.62 | 2.03 | 1.90 |
|    | 5 | 2.10 | 3.07 | 106 | 73 | 6.7 | 57 | 1.61 | 2.05 | 1.99 |

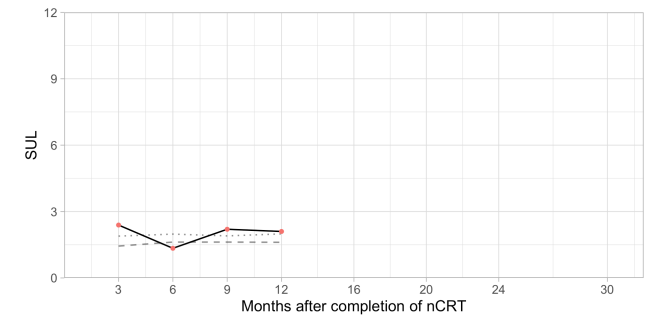



|    |    |      |      |    |    |     |    |      |      |      |
|----|----|------|------|----|----|-----|----|------|------|------|
| 41 | 2  | 2.21 | 2.83 | 89 | 70 | 5.2 | 60 | 1.40 | 1.85 | 1.79 |
|    | 3  | 1.75 | 2.29 | 94 | 72 | 5.7 | 61 | 1.31 | 1.70 | 1.88 |
|    | 4  | 2.03 | 2.76 | 95 | 70 | 5.2 | 64 | 1.43 | 1.92 | 1.68 |
|    | 5  | 1.77 | 2.43 | 97 | 71 | 5.7 | 55 | 1.48 | 1.76 | 1.42 |
|    | 6  | 1.55 | 2.14 | 98 | 71 | 5.4 | 59 | 1.11 | 1.62 | 1.43 |
|    | 7  | 1.63 | 2.25 | 98 | 71 | 5.2 | 60 | 1.34 | 1.73 | 1.84 |
|    | 8  | 1.61 | 2.22 | 98 | 71 | 5.6 | 65 | 1.24 | 1.64 | 1.39 |
|    | 9  | 1.50 | 2.07 | 98 | 71 | 5.0 | 58 | 1.36 | 2.29 | 1.55 |
|    | 10 | 1.42 | 1.94 | 96 | 70 | 5.6 | 58 | 1.36 | 1.65 | 1.52 |

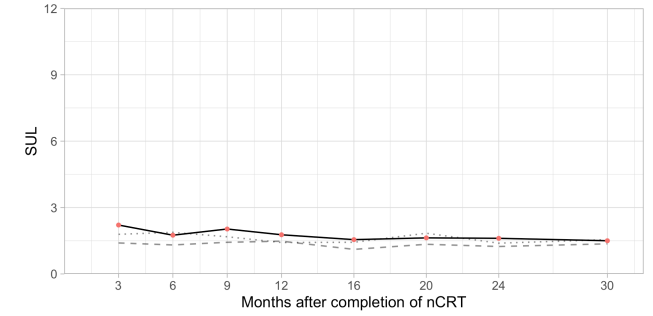

LBM = lean body mass;  $SUL_{max}$  = maximum standardized uptake value corrected for lean body mass;  $SUL_{max, oes}$  =  $SUL_{max}$  in the physiological esophagus; nCRT = neoadjuvant chemoradiotherapy.

**Supplemental Table 3. Tumor characteristics of patients who developed local tumor recurrence, shown separately for different patterns of SUL<sub>max</sub> increases, and of patients with ongoing clinically complete response**

|                              | Local tumor recurrence<br>(n = 24)                 |                                                         |                   | Ongoing<br>cCR<br>(n = 17) |
|------------------------------|----------------------------------------------------|---------------------------------------------------------|-------------------|----------------------------|
|                              | Gradual SUL <sub>max</sub><br>increase<br>(n = 19) | Steep (>180%)<br>SUL <sub>max</sub> increase<br>(n = 5) | Total<br>(n = 24) |                            |
| <b>Histology</b>             |                                                    |                                                         |                   |                            |
| Squamous cell carcinoma      | 2                                                  | 2                                                       | 4                 | 6                          |
| Adenocarcinoma               | 17                                                 | 3                                                       | 20                | 10                         |
| Adenosquamous carcinoma      | 0                                                  | 0                                                       | 0                 | 1                          |
| <b>cT*</b>                   |                                                    |                                                         |                   |                            |
| cT1                          | 0                                                  | 0                                                       | 0                 | 0                          |
| cT2                          | 7                                                  | 1                                                       | 8                 | 3                          |
| cT3                          | 12                                                 | 4                                                       | 16                | 11                         |
| cT4                          | 0                                                  | 0                                                       | 0                 | 1                          |
| cTx                          | 0                                                  | 0                                                       | 0                 | 1                          |
| Missing                      | 0                                                  | 0                                                       | 0                 | 1                          |
| <b>cN*</b>                   |                                                    |                                                         |                   |                            |
| cN0                          | 8                                                  | 2                                                       | 10                | 7                          |
| cN1                          | 5                                                  | 0                                                       | 5                 | 6                          |
| cN2                          | 6                                                  | 3                                                       | 9                 | 2                          |
| cNx                          | 0                                                  | 0                                                       | 0                 | 1                          |
| Missing                      | 0                                                  | 0                                                       | 0                 | 1                          |
| <b>Differentiation grade</b> |                                                    |                                                         |                   |                            |
| Good-moderate                | 7                                                  | 3                                                       | 10                | 6                          |
| Poor                         | 6                                                  | 0                                                       | 6                 | 4                          |
| Missing                      | 6                                                  | 2                                                       | 8                 | 7                          |

Data represent number of patients.

\*Clinical tumor staging was according to the 7<sup>th</sup> edition of the International Union against Cancer's TNM classification.

cCR = clinically complete response
